# Supplementary material
Source: PubMed Central journal article supplement (PMC7327025)
Supplement: mmc1.pdf [file mmc1.pdf]

## Supplementary materials

**Table A1**

Participants' characteristics

| Characteristics                | Number n (%) |
|--------------------------------|--------------|
| <i>Total</i>                   | 543          |
| <i>Research experience</i>     |              |
| < 3 years                      | 130 (23.9)   |
| 3-5 years                      | 115 (21.1)   |
| 6-9 years                      | 81 (14.9)    |
| 10-15 years                    | 88 (16.2)    |
| > 15 years                     | 129 (23.7)   |
| <i>Duties besides research</i> |              |
| Exams                          | 149 (27.4)   |
| Teaching                       | 231 (42.5)   |
| Clinical                       | 268 (49.3)   |
| Logistics                      | 215 (39.5)   |
| Other                          | 41 (7.5)     |
| None                           | 99 (18.2)    |
| <i>Position</i>                |              |
| MSc student                    | 13 (2.4)     |
| PhD student                    | 125 (23.0)   |
| Post-Doc                       | 48 (8.8)     |
| In training†                   | 62 (11.4)    |
| Lecturer                       | 15 (2.8)     |
| Professor*                     | 101 (18.5)   |
| Medical Physicist              | 93 (17.1)    |
| Biologist                      | 15 (2.8)     |
| RTT                            | 18 (3.3)     |
| Oncologist                     | 116 (21.3)   |
| Other                          | 57 (10.5)    |

\* Assistant professor + Associate professor + Full professor, † MD or Medical Physicist in training + MD resident.

**Supplementary Table A2**  
Country of work of the participants.

| <b>Country of work</b>   | <b>Number of respondents</b> | <b>Percentage</b> |
|--------------------------|------------------------------|-------------------|
| Italy                    | 89                           | 16.36%            |
| Netherlands              | 89                           | 16.36%            |
| France                   | 50                           | 9.19%             |
| United Kingdom           | 48                           | 8.82%             |
| Poland                   | 39                           | 7.17%             |
| Switzerland              | 31                           | 5.70%             |
| Denmark                  | 24                           | 4.41%             |
| United States of America | 22                           | 4.04%             |
| Australia                | 21                           | 3.86%             |
| Belgium                  | 16                           | 2.94%             |
| Germany                  | 15                           | 2.76%             |
| Spain                    | 14                           | 2.57%             |
| Slovenia                 | 10                           | 1.84%             |
| Ireland                  | 9                            | 1.65%             |
| Canada                   | 7                            | 1.29%             |
| India                    | 7                            | 1.29%             |
| Norway                   | 7                            | 1.29%             |
| Tunisia                  | 5                            | 0.92%             |
| Austria                  | 4                            | 0.74%             |
| Croatia                  | 3                            | 0.55%             |
| Portugal                 | 3                            | 0.55%             |
| Romania                  | 3                            | 0.55%             |
| Albania                  | 2                            | 0.37%             |
| China                    | 2                            | 0.37%             |
| Czech Republic           | 2                            | 0.37%             |
| Kuwait                   | 2                            | 0.37%             |
| Pakistan                 | 2                            | 0.37%             |
| Angola                   | 1                            | 0.18%             |
| Bangladesh               | 1                            | 0.18%             |
| Brazil                   | 1                            | 0.18%             |

|                            |     |       |
|----------------------------|-----|-------|
| Bulgaria                   | 1   | 0.18% |
| Cyprus                     | 1   | 0.18% |
| Finland                    | 1   | 0.18% |
| Georgia                    | 1   | 0.18% |
| Ghana                      | 1   | 0.18% |
| Hungary                    | 1   | 0.18% |
| Indonesia                  | 1   | 0.18% |
| Iran (Islamic Republic of) | 1   | 0.18% |
| New Zealand                | 1   | 0.18% |
| Peru                       | 1   | 0.18% |
| Singapore                  | 1   | 0.18% |
| Slovakia                   | 1   | 0.18% |
| Sweden                     | 1   | 0.18% |
| Thailand                   | 1   | 0.18% |
| Turkey                     | 1   | 0.18% |
| <hr/>                      |     |       |
| Total                      | 544 | 100%  |
| <hr/>                      |     |       |

## Appendix A – full results statistical analysis

### Group comparisons, HADS-A

- An univariate ANOVA showed the presence of significant differences between participants who have support from institution programs (n = 101) vs. participants who have support from colleagues/family/friends (n = 162) vs. participants who have no support at all (n = 72) (mean ± SD: 6.30 ± 3.85 vs. 7.12 ± 3.82 vs. 7.81 ± 4.03;  $F(2, 332) = 3.296$ ,  $p = .038$ , partial  $\eta^2 = 0.02$ ).
- Tukey HSD post hoc tests revealed a statistically significant difference between people who receive support from institution programs and people who have no support (-1.509 95% CI (-2.92 to -0.10),  $p = .032$ ).
- No significant differences were detected on the HADS-A scores
  - between participants who are in training (n = 119) vs. not in training (n = 216) (mean ± SD: 7.47 ± 4.25 vs. 6.77 ± 3.68;  $t(215.21) = 1.505$ ,  $p = .134$ ,  $d = 0.18$ ),
  - between PhD students (n = 79) vs. other professionals (n = 256) (mean ± SD: 7.32 ± 4.51 vs. 6.93 ± 3.70;  $t(112.14) = 0.770$ ,  $p = .490$ ,  $d = 0.09$ ),
  - between participants with clinical duties (n = 162) vs. non-clinical duties (n = 173) in addition to research (mean ± SD: 6.88 ± 3.61 vs. 7.16 ± 4.16;  $t(333) = -0.655$ ,  $p = .513$ ,  $d = 0.07$ ),
  - between participants who have virtual or non-virtual contacts with colleagues/friends/family (n = 328) vs. no contact at all (n = 7) (mean ± SD: 7.02 ± 3.92 vs. 7.14 ± 2.97;  $t(333) = -0.083$ ,  $p = .934$ ,  $d = 0.03$ ),
  - between participants who have taken measures to cope with isolation (n = 311) vs. no measures (n = 24) (mean ± SD: 7.06 ± 3.90 vs. 6.50 ± 3.96;  $t(333) = 0.678$ ,  $p = .498$ ,  $d = 0.14$ ),
  - between participants who work at the office (n = 78) vs. from home [M2] (n = 257) (mean ± SD: 7.50 ± 4.15 vs. 6.88 ± 3.82;  $t(333) = 1.239$ ,  $p = .216$ ,  $d = 0.16$ ).

### Group comparisons on participants with clinically relevant symptoms, HADS-A ≥ 8

- Results of *t*-tests showed the presence of significant differences
  - between PhD students (n = 35) vs. other professionals (n = 103) (mean ± SD: 11.57 ± 2.79 vs. 10.53 ± 2.56;  $t(136) = 2.025$ ,  $p = .045$ ,  $d = 0.39$ ).

For all other group comparisons, no significant differences were detected on the HADS-A scores ( $p$ -values > .05).

### Group comparisons, HADS-D

- A univariate ANOVA showed the presence of statistically significant differences between participants who have support from institution programs vs. participants who have support from colleagues/family/friends vs. participants who have no support at all (mean ± SD: 4.29 ± 3.02 vs. 4.80 ± 3.32 vs. 6.56 ± 4.06;  $F(2, 165.97) = 8.094$ ,  $p < .001$ , partial  $\eta^2 = 0.06$ ).
- Games-Howell post hoc tests revealed statistically significant differences between people who have no support and both people who receive support from institution programs (2.268 95% CI (0.93 to 3.61),  $p < .001$ ) and people who receive support from colleagues/family/friends (1.753 95% CI (0.47 to 3.04),  $p = .004$ ).
- Results of *t*-tests showed the presence of significant differences on the HADS-D scores
  - between participants who have virtual or non-virtual contacts with colleagues/friends/family vs. no contact at all (mean ± SD: 4.97 ± 3.42 vs. 7.57 ± 4.39;  $t(333) = -1.980$ ,  $p = .049$ ,  $d = 0.66$ ).
  - between participants who work at the office vs. from home (mean ± SD: 5.94 ± 4.23 vs. 4.75 ± 3.14;  $t(104.02) = 2.297$ ,  $p = .024$ ,  $d = 0.32$ ).
- No significant differences were detected
  - between participants who are in training vs. not in training (mean ± SD: 5.31 ± 3.97 vs. 4.87 ± 3.14;  $t(200.38) = 1.056$ ,  $p = .292$ ,  $d = 0.12$ ),
  - between PhD students vs. other professionals (mean ± SD: 5.04 ± 3.80 vs. 5.02 ± 3.35;  $t(333) = 0.041$ ,  $p = .967$ ,  $d = 0.01$ ),
  - between participants with clinical duties vs. non-clinical duties in addition to research (mean ± SD: 5.24 ± 3.63 vs. 4.82 ± 3.28;  $t(333) = 1.112$ ,  $p = .267$ ,  $d = 0.12$ ).

- between participants who have taken measures to cope with isolation vs. no measures (mean  $\pm$  SD:  $5.00 \pm 3.34$  vs.  $5.38 \pm 4.79$ ;  $t(24.76) = -0.380$ ,  $p = .707$ ,  $d = 0.09$ ).

*Group comparisons on participants with clinically relevant symptoms, HADS-D  $\geq 8$*

- Results of t-tests showed the presence of significant differences between
  - participants who are in training ( $n = 31$ ) vs. not in training ( $n = 40$ ) (mean  $\pm$  SD:  $11.03 \pm 2.36$  vs.  $9.93 \pm 1.81$ ;  $t(69) = 2.235$ ,  $p = .029$ ,  $d = 0.52$ )
  - between participants who have virtual or non-virtual contacts with colleagues/friends/family ( $n = 69$ ) vs. no contact at all ( $n = 2$ ) (mean  $\pm$  SD:  $10.32 \pm 2.08$  vs.  $13.50 \pm 2.12$ ;  $t(69) = -2.136$ ,  $p = .036$ ,  $d = 1.51$ ).

For all other group comparisons, no significant differences were detected on the HADS-D scores ( $p$ -values  $> .05$ ).

*Correlation analyses*

- Significant negative correlations were found:
  - between anxiety symptoms and years of research experience ( $r_s(333) = -0.148$ ,  $p = .007$ )
  - between anxiety/depressive symptoms and the productivity levels after COVID-19 outbreak (HADS-A:  $r_s(333) = -0.112$ ,  $p = .040$ ; HADS-D:  $r_s(333) = -0.235$ ,  $p < .001$ )
  - between anxiety/depressive symptoms and the impact of isolation on mental health and wellbeing (HADS-A:  $r_s(333) = -0.384$ ,  $p < .001$ ; HADS-D:  $r_s(333) = -0.411$ ,  $p < .001$ ).
- Significant positive correlations were found:
  - between anxiety/depressive symptoms and feeling guilty about the current productivity levels (HADS-A:  $r_s(333) = 0.312$ ,  $p < .001$ ; HADS-D:  $r_s(333) = 0.334$ ,  $p < .001$ )
  - between anxiety/depressive symptoms and worry about mental health in case of prolonged isolation (HADS-A:  $r_s(333) = 0.402$ ,  $p < .001$ ; HADS-D:  $r_s(333) = 0.441$ ,  $p < .001$ ).

*Chi square tests (Additional analyses were performed to investigate group differences based on the cut-off score ( $\geq 8$ ) for both the HADS-A and HADS-D.)*

- HADS-A, chi-square tests showed a statistically significant difference on:
  - The 'current workplace' variable (people who work at the office: 41 scored above the HADS-A cut-off score, 37 below the cut-off point; people who work from home: 97 scored above the HADS-A cut-off score, 160 below the cut-off point;  $\chi^2(1) = 5.426$ ,  $p = .020$ ).
- HADS-D, chi-square tests showed statistically significant differences on:
  - The 'current work place' variable (people who work at the office: 26 scored above the HADS-D cut-off score, 52 below the cut-off point; people who work from home: 45 scored above the HADS-A cut-off score, 212 below the cut-off point;  $\chi^2(1) = 8.971$ ,  $p = .003$ )
  - The 'support received to cope with mental health' variables (participants who have support from institution programs: 13 scored above the HADS-D cut-off score, 88 below the cut-off point; participants who have support from colleagues/family/friends: 30 scored above the HADS-D cut-off score, 132 below the cut-off point; participants who have no support: 44 scored above the HADS-D cut-off score, 28 below the cut-off point;  $\chi^2(1) = 18.381$ ,  $p < .001$ ).

For all other group comparisons, no significant differences were detected between participants who scored above either the HADS-A or HADS-D cut-off point (all  $p$ -values  $> .05$ ).

## Conducting research in Radiation Oncology remotely: coping with isolation

\* 1. What is your name ? **this information will remain anonymous!**

\* 2. In what country do you work?

\* 3. How many years of research experience do you have?

- I do not work in research
- < 3 years
- 3-5 years
- 6-9 years
- 10-15 years
- >15 years

\* 4. What is your position?

- MSc student
- PhD student
- MD resident
- Medphys training / residency training
- Medical physicist
- Radiation/clinical oncologist
- RTT
- Biologist
- post doc
- lecturer
- assistant professor
- associate professor
- full professor
- Other (please specify)

\* 5. What is your field of research?

- clinical/radiation oncology
- medical physics
- radiobiology
- computer/data science
- radiotherapy technology (RTT)
- Other (please specify)

\* 6. What other duties do you have (in addition to your research)?

- exams, courses to validate
- teaching duties
- clinical duties
- organisational / logistics duties
- no other duties
- Other (please specify)

\* 7. You currently work:

- completely from home
- part time from home
- completely at the office/lab/clinic

\* 8. Do you feel equally productive as pre-covid ?

- a lot less
- a little less
- about equally productive
- a little more
- a lot more

\* 9. Do you feel guilty about your productivity?

- yes a lot
- yes a little
- not much
- not at all

\* 10. How much contact do you currently have?

- I have little or no contact (virtual or non-virtual) with anyone
- I have virtual contacts with friends and/or family
- I have virtual contacts with colleagues
- I have non-virtual contacts with friends and/or family
- I have non-virtual contacts with colleagues

\* 11. Do you feel an impact of isolation on your mental health/well being at the moment?

- a large negative impact
- a small negative impact
- no impact
- a positive impact

\* 12. Are you worried about you mental health if the isolation period continues?

- I am very worried I won't be able to take it much longer
- I am a little worried it will become an issue soon
- I think I can continue like this for a few more weeks but not months
- I think I can continue like this for a few months or more



\* 13. What measures do you take to cope with isolation?

- online coffee breaks/lunches/socials with friends/family
- online coffee breaks/lunches/socials with colleagues
- more work-related online meetings
- exercise at home
- picked up a new hobby
- go for walks with few people (depends on government regulations!)
- nothing
- Other (please specify)

\* 14. Do you feel like these measures (Q13) are helping?

- a lot
- a little
- no
- I entered "nothing" above

\* 15. Do you have support to cope with mental health?

- yes my institution has a program and reminded me of it
- yes my institution created a program
- yes I can talk to my supervisor/boss/colleagues about my mental health
- there may be a program but I was not reminded of it
- yes I can talk to friends/family
- no there is nothing available to me

\* 16. Do you wish to take a depression and anxiety test (2-5 additional minutes)?

- Yes
- No

## Conducting research in Radiation Oncology remotely: coping with isolation

### HADS test

The Hospital Anxiety and Depression Scale (HADS) was devised 30 years ago by Zigmond and Snaith (The Hospital Anxiety and Depression Scale. Acta Psychiatr Scand 1983;67:361–370) to measure anxiety and depression in a general medical population of patients.

For each scale separately (A= anxiety, D= depression), a score below 7 indicate a non-case. 8-10 indicate a mild case; 11-14 indicate a moderate case; 15-21 indicate a severe case.

**Do not take too long to think about your reply, your immediate answer is best.**

\* 1. A. I feel tense or "wound up"

- Most of the time (3)
- A lot of the time (2)
- From time to time, occasionally (1)
- Not at all (0)

\* 2. D. I still enjoy the things I used to enjoy

- Definitely as much (0)
- Not quite so much (1)
- Only a little (2)
- Hardly at all (3)

\* 3. A. I get a sort of frightened feeling as if something awful is about to happen

- Very definitely and quite badly (3)
- Yes, but not too badly (2)
- A little, but it doesn't worry me (1)
- Not at all (0)

\* 4. D. I can laugh and see the funny side of things

- As much as I always could (0)
- Not quite so much now (1)
- Definitely not so much now (2)
- Not at all (3)

\* 5. A. Worrying thoughts go through my mind

- A great deal of the time (3)
- A lot of the time (2)
- From time to time, but not too often (1)
- Only occasionally (0)

\* 6. D. I feel cheerful

- Not at all (3)
- Not often (2)
- Sometimes (1)
- Most of the time (0)

\* 7. A. I can sit at ease and feel relaxed

- Definitely (0)
- Usually (1)
- Not often (2)
- Not at all (3)

\* 8. D. I feel as if I am slowed down

- Nearly all the time (3)
- Very often (2)
- Sometimes (1)
- Not at all (0)

\* 9. A. I get a sort of frightened feeling like "butterflies" in the stomach

- Not at all (0)
- Occasionally (1)
- Quite often (2)
- Very often (3)

\* 10. D. I have lost interest in my appearance

- Definitely (3)
- I don't take as much care as I should (2)
- I may not take quite as much care (1)
- I take just as much care as ever (0)

\* 11. A. I feel restless as I have to be on the move

- Very much indeed (3)
- Quite a lot (2)
- Not very much (1)
- Not at all (0)

\* 12. D. I look forward with enjoyment to things

- As much as I ever did (0)
- Rather less than I used to (1)
- Definitely less than I used to (2)
- Hardly at all (3)

\* 13. A. I get sudden feelings of panic

- Very often indeed (3)
- Quite often (2)
- Not very often (1)
- Not at all (0)

\* 14. D. I can enjoy a good book or radio or TV program

- Often (0)
- Sometimes (1)
- Not often (2)
- Very seldom (3)
